# Supplementary material for: Circulating miRNA profile in HCV infected serum: novel insight into pathogenesis
Source: PubMed Central journal article supplement — Sci Rep. 2013 Apr 3;3:1555. doi: 10.1038/srep01555 (PMC3615409; doi:10.1038/srep01555), 2013-04-03
Supplement: srep01555-s1.pdf [file srep01555-s1.pdf]

## **Circulating miRNA profile in HCV infected serum: novel insight into pathogenesis**

Shivaprasad Shwetha<sup>1</sup>, Gouthamchandra K<sup>1</sup>, Madhavi Chandra<sup>2</sup>, B. Ravishankar<sup>3</sup>, M.N. Khaja<sup>2</sup>, and Saumitra Das<sup>1\*</sup>

<sup>1</sup>Department of Microbiology and Cell Biology, Indian Institute of Science, Bangalore  
560012, India

<sup>2</sup>*Bioviz Technologies Pvt. Ltd*, Sagar Society, Road No.2. Banjara Hills, Hyderabad – 500 034

<sup>3</sup>*Yashoda Hospital, Secunderabad, 500044*

### **\*Address for correspondence:**

Prof. Saumitra Das

Department of Microbiology and Cell Biology

Indian Institute of Science, Bangalore-560012, India

Phone: +91 80 2293 2886, Fax: +91 80 2360 2697

Email: [sdas@mcbl.iisc.ernet.in](mailto:sdas@mcbl.iisc.ernet.in)

**Key words:** miRNA, HCV, Serum miRNA, HCV Replicon, Pathogenesis

**Supplementary Material:****Supplementary Table S1:** Fold changes in serum miRNA in HCV infected samples

| <b>systematic_name</b> | <b>Fold_HCV<br/>genotype 1</b> | <b>Fold_HCV<br/>genotype 3</b> |
|------------------------|--------------------------------|--------------------------------|
| hsa-miR-451            | <b>11.04</b>                   | <b>11.90</b>                   |
| hsa-miR-21             | <b>8.38</b>                    | <b>11.51</b>                   |
| hsa-miR-19b            | <b>7.33</b>                    | <b>10.48</b>                   |
| hsa-miR-16             | <b>7.53</b>                    | <b>10.46</b>                   |
| hsa-miR-1246           | <b>8.13</b>                    | <b>10.13</b>                   |
| hsa-miR-130a           | <b>7.64</b>                    | <b>10.01</b>                   |
| hsa-miR-24             | <b>0.00</b>                    | <b>9.91</b>                    |
| hsa-miR-27a            | <b>0.00</b>                    | <b>9.87</b>                    |
| hsa-miR-23a            | <b>0.00</b>                    | <b>9.79</b>                    |
| hsa-miR-1290           | <b>8.13</b>                    | <b>9.75</b>                    |
| hsa-miR-29a            | <b>0.00</b>                    | <b>9.36</b>                    |
| hsa-miR-342-3p         | <b>0.00</b>                    | <b>8.84</b>                    |
| hsa-miR-107            | <b>6.34</b>                    | <b>8.80</b>                    |
| hsa-miR-1299           | <b>8.09</b>                    | <b>8.78</b>                    |
| hsa-miR-146a           | <b>0.00</b>                    | <b>8.63</b>                    |
| hsa-miR-19a            | <b>0.00</b>                    | <b>8.52</b>                    |
| hsa-miR-29c            | <b>0.00</b>                    | <b>8.40</b>                    |
| hsa-miR-185            | <b>0.00</b>                    | <b>8.27</b>                    |
| hsa-miR-15a            | <b>6.08</b>                    | <b>8.27</b>                    |
| hsa-miR-150            | <b>0.00</b>                    | <b>8.14</b>                    |
| hsa-miR-25             | <b>0.00</b>                    | <b>8.05</b>                    |
| hsa-miR-140-3p         | <b>0.00</b>                    | <b>7.97</b>                    |
| hsa-miR-1323           | <b>0.00</b>                    | <b>7.91</b>                    |
| hsa-miR-1305           | <b>0.00</b>                    | <b>7.85</b>                    |
| hsa-miR-1915*          | <b>0.00</b>                    | <b>7.75</b>                    |
| hsa-miR-142-5p         | <b>0.00</b>                    | <b>7.71</b>                    |
| bkv-miR-B1-5p          | <b>0.00</b>                    | <b>7.70</b>                    |
| hsa-miR-20a            | <b>0.00</b>                    | <b>7.69</b>                    |
| hsa-miR-516a-5p        | <b>0.00</b>                    | <b>7.67</b>                    |
| hsa-miR-629*           | <b>0.00</b>                    | <b>7.54</b>                    |
| hsa-miR-130b           | <b>5.87</b>                    | <b>7.54</b>                    |
| hsa-miR-887            | <b>0.00</b>                    | <b>7.50</b>                    |
| hsa-let-7i             | <b>0.00</b>                    | <b>7.47</b>                    |
| hsa-miR-526b           | <b>5.82</b>                    | <b>7.37</b>                    |
| hsa-miR-205            | <b>0.00</b>                    | <b>7.36</b>                    |
| hsa-miR-520b           | <b>0.00</b>                    | <b>7.35</b>                    |

|                    |             |             |
|--------------------|-------------|-------------|
| hsa-miR-1300_v13.0 | <b>0.00</b> | <b>7.21</b> |
| hsa-miR-15b        | <b>0.00</b> | <b>7.14</b> |
| hsa-miR-625*       | <b>0.00</b> | <b>7.10</b> |
| hsa-miR-126        | <b>0.00</b> | <b>7.05</b> |
| hsa-miR-1260       | <b>6.80</b> | <b>7.00</b> |
| hsa-miR-584        | <b>7.51</b> | <b>6.98</b> |
| hsa-miR-196a       | <b>0.00</b> | <b>6.96</b> |
| hsa-miR-365        | <b>0.00</b> | <b>6.88</b> |
| hsa-miR-564        | <b>5.34</b> | <b>6.81</b> |
| hsa-miR-30e        | <b>0.00</b> | <b>6.77</b> |
| hsa-miR-423-5p     | <b>5.39</b> | <b>6.74</b> |
| hsa-miR-583        | <b>0.00</b> | <b>6.61</b> |
| hsa-miR-106b       | <b>0.00</b> | <b>6.60</b> |
| hsa-miR-1469       | <b>0.00</b> | <b>6.59</b> |
| hsa-let-7g         | <b>0.00</b> | <b>6.46</b> |
| hsa-miR-1303       | <b>0.00</b> | <b>6.45</b> |
| hsa-let-7d*        | <b>0.00</b> | <b>6.44</b> |
| hsa-let-7b         | <b>0.00</b> | <b>6.43</b> |
| hsa-miR-221        | <b>0.00</b> | <b>6.40</b> |
| hsa-miR-663b       | <b>0.00</b> | <b>6.35</b> |
| hsa-miR-654-5p     | <b>0.00</b> | <b>6.28</b> |
| hsa-miR-516b       | <b>0.00</b> | <b>6.25</b> |
| hsa-miR-27b        | <b>0.00</b> | <b>6.23</b> |
| hsa-miR-101        | <b>0.00</b> | <b>6.23</b> |
| ebv-miR-BART7      | <b>3.49</b> | <b>6.22</b> |
| hsa-miR-425        | <b>0.00</b> | <b>6.12</b> |
| hsa-miR-17         | <b>0.00</b> | <b>6.08</b> |
| hsa-miR-122        | <b>0.00</b> | <b>6.08</b> |
| hsa-miR-492        | <b>0.00</b> | <b>6.04</b> |
| hsa-miR-1470       | <b>0.00</b> | <b>5.98</b> |
| hsa-miR-361-5p     | <b>0.00</b> | <b>5.97</b> |
| hsa-miR-302c*      | <b>0.00</b> | <b>5.96</b> |
| hsa-miR-151-3p     | <b>0.00</b> | <b>5.94</b> |
| hsa-miR-1208       | <b>6.00</b> | <b>5.94</b> |
| hsa-miR-148b       | <b>0.00</b> | <b>5.89</b> |
| hsa-miR-196b       | <b>0.00</b> | <b>5.87</b> |
| hsa-miR-199a-3p    | <b>0.00</b> | <b>5.83</b> |
| hsa-miR-199a-5p    | <b>0.00</b> | <b>5.83</b> |
| hsa-miR-1182       | <b>4.51</b> | <b>5.71</b> |
| hsa-miR-345        | <b>0.00</b> | <b>5.33</b> |
| hsa-miR-183*       | <b>0.00</b> | <b>5.29</b> |

|                  |              |             |
|------------------|--------------|-------------|
| hsa-miR-186*     | <b>0.00</b>  | <b>5.28</b> |
| hsa-miR-30d      | <b>4.19</b>  | <b>5.14</b> |
| hsa-miR-18b*     | <b>0.00</b>  | <b>4.88</b> |
| hsa-miR-520e     | <b>-2.41</b> | <b>4.79</b> |
| hsa-miR-1237     | <b>-3.32</b> | <b>4.61</b> |
| hsa-miR-328      | <b>-2.74</b> | <b>4.55</b> |
| hsa-miR-125a-3p  | <b>-3.33</b> | <b>4.54</b> |
| hsa-miR-30c-2*   | <b>3.15</b>  | <b>4.38</b> |
| hsa-miR-373*     | <b>3.28</b>  | <b>4.27</b> |
| hcmv-miR-US33-5p | <b>-2.28</b> | <b>4.17</b> |
| hsa-miR-223      | <b>0.53</b>  | <b>3.99</b> |
| hsa-miR-324-3p   | <b>-2.94</b> | <b>3.84</b> |
| hsa-miR-769-3p   | <b>1.21</b>  | <b>3.70</b> |
| hsa-miR-22       | <b>1.36</b>  | <b>3.69</b> |
| hsa-miR-659      | <b>1.46</b>  | <b>3.67</b> |
| hsa-miR-198      | <b>1.73</b>  | <b>3.48</b> |
| hsa-miR-30c-1*   | <b>1.68</b>  | <b>3.48</b> |
| hsa-miR-665      | <b>-2.29</b> | <b>3.41</b> |
| hsa-miR-874      | <b>1.10</b>  | <b>3.41</b> |
| hsa-miR-622      | <b>-2.92</b> | <b>3.40</b> |
| hsa-miR-320d     | <b>2.72</b>  | <b>3.29</b> |
| hsa-miR-149*     | <b>1.08</b>  | <b>3.26</b> |
| hsa-miR-320c     | <b>1.74</b>  | <b>3.24</b> |
| hsa-miR-1275     | <b>1.63</b>  | <b>3.21</b> |
| hsa-miR-765      | <b>1.40</b>  | <b>3.16</b> |
| hsa-miR-483-5p   | <b>1.25</b>  | <b>3.06</b> |
| hsa-miR-1229     | <b>-2.39</b> | <b>2.99</b> |
| hsa-miR-188-5p   | <b>0.80</b>  | <b>2.98</b> |
| hsa-miR-1202     | <b>0.89</b>  | <b>2.87</b> |
| hsa-miR-187*     | <b>1.34</b>  | <b>2.83</b> |
| hsa-miR-1207-5p  | <b>0.83</b>  | <b>2.78</b> |
| hsa-miR-371-3p   | <b>-3.02</b> | <b>2.76</b> |
| hsa-miR-150*     | <b>1.21</b>  | <b>2.72</b> |
| hsa-miR-1225-5p  | <b>0.71</b>  | <b>2.71</b> |
| hsa-miR-1268     | <b>1.23</b>  | <b>2.69</b> |
| hsa-miR-134      | <b>1.02</b>  | <b>2.63</b> |
| hsa-miR-623      | <b>1.24</b>  | <b>2.51</b> |
| hsa-miR-1224-5p  | <b>1.27</b>  | <b>2.51</b> |
| hcmv-miR-US4     | <b>0.85</b>  | <b>2.39</b> |
| hsa-miR-1226*    | <b>1.26</b>  | <b>2.39</b> |
| hsa-miR-371-5p   | <b>1.00</b>  | <b>2.38</b> |

|                  |              |             |
|------------------|--------------|-------------|
| hsa-miR-1249     | <b>0.63</b>  | <b>2.38</b> |
| hsa-miR-557      | <b>0.83</b>  | <b>2.23</b> |
| hsa-miR-1471     | <b>1.24</b>  | <b>2.18</b> |
| hsa-miR-1274b    | <b>1.61</b>  | <b>2.14</b> |
| hsa-miR-601      | <b>0.63</b>  | <b>2.14</b> |
| hsa-miR-320b     | <b>1.27</b>  | <b>2.04</b> |
| hsa-miR-135a*    | <b>0.85</b>  | <b>2.03</b> |
| hsa-miR-498      | <b>1.28</b>  | <b>2.00</b> |
| hsa-miR-33b*     | <b>1.06</b>  | <b>2.00</b> |
| hsa-miR-296-5p   | <b>0.32</b>  | <b>1.98</b> |
| hsa-miR-1914*    | <b>0.32</b>  | <b>1.94</b> |
| hsa-miR-671-5p   | <b>1.38</b>  | <b>1.92</b> |
| hsa-miR-877      | <b>1.17</b>  | <b>1.92</b> |
| hsa-miR-1181     | <b>0.77</b>  | <b>1.90</b> |
| hsa-miR-1228     | <b>0.45</b>  | <b>1.78</b> |
| hsa-miR-139-3p   | <b>0.98</b>  | <b>1.74</b> |
| hsa-miR-484      | <b>-0.15</b> | <b>1.68</b> |
| ebv-miR-BART13   | <b>0.09</b>  | <b>1.50</b> |
| hsa-miR-1915     | <b>0.48</b>  | <b>1.49</b> |
| hcmv-miR-UL70-3p | <b>0.77</b>  | <b>1.49</b> |
| hsa-miR-663      | <b>-0.66</b> | <b>1.46</b> |
| hsa-miR-638      | <b>0.39</b>  | <b>1.45</b> |
| hsa-miR-630      | <b>0.61</b>  | <b>1.39</b> |
| hsa-miR-149      | <b>-5.83</b> | <b>1.39</b> |
| hsa-miR-1234     | <b>0.27</b>  | <b>1.29</b> |
| hsa-let-7f-1*    | <b>-5.72</b> | <b>1.27</b> |
| hsa-miR-320a     | <b>0.26</b>  | <b>1.22</b> |
| hsa-miR-1539     | <b>-0.55</b> | <b>1.18</b> |
| hsa-miR-197      | <b>-0.52</b> | <b>1.16</b> |
| hsa-miR-1225-3p  | <b>0.25</b>  | <b>1.11</b> |
| hsa-miR-1183     | <b>-2.55</b> | <b>1.06</b> |
| hsa-miR-1238     | <b>0.18</b>  | <b>1.06</b> |
| hsa-miR-720      | <b>1.57</b>  | <b>0.99</b> |
| hsa-miR-191*     | <b>0.24</b>  | <b>0.99</b> |
| hsa-miR-575      | <b>0.28</b>  | <b>0.91</b> |
| hsa-miR-550a     | <b>-1.06</b> | <b>0.91</b> |
| hsa-miR-486-5p   | <b>0.88</b>  | <b>0.79</b> |
| hsa-miR-636      | <b>-4.47</b> | <b>0.74</b> |
| hsa-let-7b*      | <b>-6.56</b> | <b>0.68</b> |
| hsa-miR-602      | <b>-6.53</b> | <b>0.64</b> |
| hsa-miR-766      | <b>-0.64</b> | <b>0.54</b> |

|                   |              |              |
|-------------------|--------------|--------------|
| hsa-miR-1281      | <b>0.43</b>  | <b>0.42</b>  |
| hsa-miR-1280      | <b>-0.03</b> | <b>0.24</b>  |
| hsa-miR-425*      | <b>-0.05</b> | <b>0.23</b>  |
| hsa-miR-1825      | <b>0.30</b>  | <b>0.10</b>  |
| hsa-miR-1287      | <b>6.89</b>  | <b>0.00</b>  |
| hsa-miR-144       | <b>8.70</b>  | <b>0.00</b>  |
| hsa-miR-923_v12.0 | <b>-1.16</b> | <b>-0.04</b> |
| hsa-miR-877*      | <b>-0.63</b> | <b>-0.10</b> |
| ebv-miR-BART12    | <b>1.88</b>  | <b>-0.18</b> |
| hsa-miR-572       | <b>-0.77</b> | <b>-0.84</b> |
| hsa-miR-32*       | <b>1.25</b>  | <b>-1.00</b> |
| hsa-miR-563       | <b>2.56</b>  | <b>-2.63</b> |
| hsa-miR-422a      | <b>-2.80</b> | <b>-2.80</b> |
| hsa-miR-494       | <b>-3.20</b> | <b>-3.20</b> |
| ebv-miR-BART16    | <b>3.08</b>  | <b>-3.23</b> |
| hsa-miR-483-3p    | <b>0.47</b>  | <b>-5.69</b> |
